# Supplementary material for: A multilayer circuit architecture for the generation of distinct locomotor behaviors in Drosophila
Source: eLife journal article supplement (doi:10.7554/elife.51781), 2019-12-23
Supplement: supp [file elife-51781-supp-v1.zip]

Archive with 17 entries (17 files):
- elife_poa_e51781_Supplementary_file_3.xlsx
- elife_poa_e51781_Supplementary_file_1.unk
- elife_poa_e51781_Figure_7_figure_supplement_1.pdf
- elife_poa_e51781_Figure_3_figure_supplement_1.pdf
- elife_poa_e51781_Figure_4_figure_supplement_1.pdf
- elife_poa_e51781_Supplementary_file_6.xlsx
- elife_poa_e51781_Video_2.mov
- elife_poa_e51781_Supplementary_file_4.unk
- elife_poa_e51781_Figure_6_figure_supplement_1.pdf
- elife_poa_e51781_Video_1.mov
- elife_poa_e51781_Supplementary_file_2.xlsx
- elife_poa_e51781_Transparent_Reporting_File.pdf
- elife_poa_e51781_Figure_9_figure_supplement_2.pdf
- elife_poa_e51781_Figure_3_figure_supplement_2.pdf
- elife_poa_e51781_Figure_6_figure_supplement_2.pdf
- elife_poa_e51781_Supplementary_file_5.xlsx
- elife_poa_e51781_Figure_9_figure_supplement_1.pdf
