# Supplementary material for: A multilayer circuit architecture for the generation of distinct locomotor behaviors in Drosophila
Source: eLife journal article supplement (doi:10.7554/elife.51781), 2019-12-23
Supplement: supp [file elife-51781-supp-v1.zip › elife_poa_e51781_Supplementary_file_1.unk]

[
 {
  "skeleton_id": 10649843,
  "color": "#00f9e6",
  "opacity": 1
 },
 {
  "skeleton_id": 4488976,
  "color": "#00f9e6",
  "opacity": 1
 },
 {
  "skeleton_id": 14047130,
  "color": "#00f9e6",
  "opacity": 1
 },
 {
  "skeleton_id": 14048287,
  "color": "#00f9e6",
  "opacity": 1
 },
 {
  "skeleton_id": 14088149,
  "color": "#00f9e6",
  "opacity": 1
 },
 {
  "skeleton_id": 14045854,
  "color": "#00f9e6",
  "opacity": 1
 },
 {
  "skeleton_id": 14087339,
  "color": "#00f9e6",
  "opacity": 1
 },
 {
  "skeleton_id": 14047945,
  "color": "#00f9e6",
  "opacity": 1
 },
 {
  "skeleton_id": 4028114,
  "color": "#00f9e6",
  "opacity": 1
 },
 {
  "skeleton_id": 4535767,
  "color": "#00f9e6",
  "opacity": 1
 },
 {
  "skeleton_id": 20901073,
  "color": "#ffff00",
  "opacity": 1
 },
 {
  "skeleton_id": 20901068,
  "color": "#ffff00",
  "opacity": 1
 },
 {
  "skeleton_id": 4326468,
  "color": "#00f9e6",
  "opacity": 1
 },
 {
  "skeleton_id": 4881629,
  "color": "#00f9e6",
  "opacity": 1
 },
 {
  "skeleton_id": 14085813,
  "color": "#00f9e6",
  "opacity": 1
 },
 {
  "skeleton_id": 14047554,
  "color": "#00f9e6",
  "opacity": 1
 },
 {
  "skeleton_id": 8026224,
  "color": "#00f9e6",
  "opacity": 1
 },
 {
  "skeleton_id": 14047760,
  "color": "#00f9e6",
  "opacity": 1
 },
 {
  "skeleton_id": 14088451,
  "color": "#00f9e6",
  "opacity": 1
 },
 {
  "skeleton_id": 10013402,
  "color": "#00f9e6",
  "opacity": 1
 },
 {
  "skeleton_id": 10678017,
  "color": "#00f9e6",
  "opacity": 1
 },
 {
  "skeleton_id": 14046720,
  "color": "#00f9e6",
  "opacity": 1
 },
 {
  "skeleton_id": 19111930,
  "color": "#00f9e6",
  "opacity": 1
 },
 {
  "skeleton_id": 14194703,
  "color": "#00f9e6",
  "opacity": 1
 },
 {
  "skeleton_id": 14045016,
  "color": "#00f9e6",
  "opacity": 1
 },
 {
  "skeleton_id": 14206438,
  "color": "#00f9e6",
  "opacity": 1
 },
 {
  "skeleton_id": 14203725,
  "color": "#00f9e6",
  "opacity": 1
 },
 {
  "skeleton_id": 14048538,
  "color": "#00f9e6",
  "opacity": 1
 },
 {
  "skeleton_id": 19139253,
  "color": "#00f9e6",
  "opacity": 1
 },
 {
  "skeleton_id": 14045489,
  "color": "#00f9e6",
  "opacity": 1
 },
 {
  "skeleton_id": 14199031,
  "color": "#00f9e6",
  "opacity": 1
 },
 {
  "skeleton_id": 6970942,
  "color": "#00f9e6",
  "opacity": 1
 },
 {
  "skeleton_id": 14086309,
  "color": "#00f9e6",
  "opacity": 1
 },
 {
  "skeleton_id": 16181494,
  "color": "#00f9e6",
  "opacity": 1
 },
 {
  "skeleton_id": 16433395,
  "color": "#00f9e6",
  "opacity": 1
 },
 {
  "skeleton_id": 5085455,
  "color": "#00f9e6",
  "opacity": 1
 },
 {
  "skeleton_id": 6467481,
  "color": "#00f9e6",
  "opacity": 1
 },
 {
  "skeleton_id": 16713121,
  "color": "#00f9e6",
  "opacity": 1
 },
 {
  "skeleton_id": 4042315,
  "color": "#00f9e6",
  "opacity": 1
 },
 {
  "skeleton_id": 4102728,
  "color": "#00f9e6",
  "opacity": 1
 },
 {
  "skeleton_id": 4289773,
  "color": "#00f9e6",
  "opacity": 1
 },
 {
  "skeleton_id": 4121534,
  "color": "#00f9e6",
  "opacity": 1
 },
 {
  "skeleton_id": 4717729,
  "color": "#00f9e6",
  "opacity": 1
 },
 {
  "skeleton_id": 16080562,
  "color": "#00f9e6",
  "opacity": 1
 },
 {
  "skeleton_id": 4524871,
  "color": "#00f9e6",
  "opacity": 1
 },
 {
  "skeleton_id": 4397287,
  "color": "#00f9e6",
  "opacity": 1
 },
 {
  "skeleton_id": 4326520,
  "color": "#00f9e6",
  "opacity": 1
 },
 {
  "skeleton_id": 4101976,
  "color": "#00f9e6",
  "opacity": 1
 },
 {
  "skeleton_id": 5899328,
  "color": "#00f9e6",
  "opacity": 1
 },
 {
  "skeleton_id": 14048876,
  "color": "#00f9e6",
  "opacity": 1
 },
 {
  "skeleton_id": 4274364,
  "color": "#00f9e6",
  "opacity": 1
 },
 {
  "skeleton_id": 4382895,
  "color": "#00f9e6",
  "opacity": 1
 },
 {
  "skeleton_id": 14194234,
  "color": "#00f9e6",
  "opacity": 1
 },
 {
  "skeleton_id": 14087107,
  "color": "#00f9e6",
  "opacity": 1
 },
 {
  "skeleton_id": 13058240,
  "color": "#00f9e6",
  "opacity": 1
 },
 {
  "skeleton_id": 13057994,
  "color": "#00f9e6",
  "opacity": 1
 },
 {
  "skeleton_id": 14044614,
  "color": "#00f9e6",
  "opacity": 1
 },
 {
  "skeleton_id": 14199565,
  "color": "#00f9e6",
  "opacity": 1
 },
 {
  "skeleton_id": 14086623,
  "color": "#ffff00",
  "opacity": 1
 },
 {
  "skeleton_id": 14197913,
  "color": "#ffff00",
  "opacity": 1
 },
 {
  "skeleton_id": 4461322,
  "color": "#ffff00",
  "opacity": 1
 }
]
