# Supplementary material for: A multilayer circuit architecture for the generation of distinct locomotor behaviors in Drosophila
Source: eLife journal article supplement (doi:10.7554/elife.51781), 2019-12-23
Supplement: supp [file elife-51781-supp-v1.zip › elife_poa_e51781_Supplementary_file_2.xlsx]

## Sheet: Sheet1
PMN	Synonyms	References
A01c1_a1l	eIN-2	PMID: 27537488
A01c1_a1r	eIN-2	PMID: 27537488
A01c1_a2l	eIN-2	PMID: 27537488
A01c1_a2r	eIN-2	PMID: 27537488
A01c2_a1l (ipsi_dendrite)
A01c2_a1r (ipsi_dendrite)
A01c2_a2l (ipsi_dendrite)
A01c2_a2r (ipsi_dendrite)
A01d3_a1l	eIN-3, Ifb-F	PMID: 27537488, PMID: 31201326
A01d3_a1r	eIN-3, Ifb-F	PMID: 27537488, PMID: 31201326
A01d3_t3l (T01d3)	eIN-3, Ifb-F	PMID: 27537488, PMID: 31201326
A01d3_t3r (T01d3)	eIN-3, Ifb-F	PMID: 27537488, PMID: 31201326
A01j_a1l
A01j_a1r
A01x_a1l
A01x_a1r
A01x2_a1l
A01x2_a1r
A01x2_t3l (T01x2)
A01x2_t3r (T01x2)
A01x3_a1l
A01x3_a1r
A02b_a1l	PMSI	PMID: 25438948
A02b_a1r	PMSI	PMID: 25438948
A02e_a1l	PMSI	PMID: 25438948
A02e_a1r	PMSI	PMID: 25438948
A02f_a1l	PMSI	PMID: 25438948
A02f_a1r	PMSI	PMID: 25438948
A02g_a1l	PMSI	PMID: 25438948
A02g_a1r	PMSI	PMID: 25438948
A02g_a2l	PMSI	PMID: 25438948
A02g_a2r	PMSI	PMID: 25438948
A02h_a1l	PMSI	PMID: 25438948
A02h_a1r	PMSI	PMID: 25438948
A02i_a1l	PMSI	PMID: 25438948
A02i_a1r	PMSI	PMID: 25438948
A02i_a2l	PMSI	PMID: 25438948
A02i_a2r	PMSI	PMID: 25438948
A02i_a3l	PMSI	PMID: 25438948
A02i_a3r	PMSI	PMID: 25438948
A02j_a3l	PMSI	PMID: 25438948
A02j_a3r	PMSI	PMID: 25438948
A02m_a1l Pseudolooper-3	PMSI, maybe mCSIs	PMID: 25438948, PMID: 28803873
A02m_a1r Pseudolooper-3	PMSI, maybe mCSIs	PMID: 25438948, PMID: 28803873
A02n_a1l Pseudolooper-4	PMSI, maybe mCSIs	PMID: 25438948, PMID: 28803873
A02n_a1r Pseudolooper-4	PMSI, maybe mCSIs	PMID: 25438948, PMID: 28803873
A03a1_a1l (pre dMNs)	eIN-4	PMID: 27537488
A03a1_a1r (pre dMNs)	eIN-4	PMID: 27537488
A03a3_a1l (pre dMNs)
A03a3_a1r (pre dMNs)
A03a3_t3l (was T03a1)
A03a3_t3r (was T03a1)
A03a4_a1l	eIN-5	PMID: 27537488
A03a4_a1r	eIN-5	PMID: 27537488
A03a4_a2l	eIN-5	PMID: 27537488
A03a4_a2r	eIN-5	PMID: 27537488
A03a5_a1l
A03a5_a1r
A03a6_a1l
A03a6_a1r
a03d/e_a1l
a03d/e_a1r
a03d/e_a2l
a03d/e_a2r
A03EGB_a2l (EGHBAL)
A03EGB_a2r (EGHBAL)
A03g_a1l
A03g_a1r
A03g_t3l (T03g)
A03g_t3r (T03g)
A03g2_t3l (T03g2)
A03g2_t3r (T03g2)
A03o_a2l
A03o_a2l
A03SNC_a2l
A03SNC_a2r
A03SNC_a3l
A03SNC_a3r
A03xKT_a1l
A03xKT_a1r
A05a_a1l
A05a_a1r
A05a_t3l
A05a_t3r
A05k_a1l
A05k_a1r
A06a_a1l
A06a_a1r
A06c_a1l
A06c_a1r
A06e_a1l	Saaghi-3	PMID: 26439528
A06e_a1r	Saaghi-3	PMID: 26439528
A06e_t3l	Saaghi-3	PMID: 26439528
A06e_t3r	Saaghi-3	PMID: 26439528
A06f_a1l	Saaghi-2
A06f_a1r	Saaghi-2
A06f_t3l	Saaghi-2
A06f_t3r	Saaghi-2
A06g2_a1l	Saaghi-5
A06g2_a1r	Saaghi-5
A06l_a1l	Saaghi-1	PMID: 26439528
A06l_a1r	Saaghi-1	PMID: 26439528
A06m_a1l
A06m_a1r
A06x1_a1l
A06x1_a1r
A06x1_a2l
A06x1_a2r
A07f2_a1l
A07f2_a1r
A08e1_a1l	EL interneurons	PMID: 26439528
A08e1_a1r	EL interneurons	PMID: 26439528
A09l_a1l	Down-and-back-1	PMID: 29528286
A09l_a1r	Down-and-back-1	PMID: 29528286
A10a_a1l Chair-1
A10a_a1r Chair-1
A10a_a2l Chair-1
A10a_a2r Chair-1
A10e_a2l
A10e_a2r
A14a_a1l	iIN-1	PMID: 27537488
A14a_a1r	iIN-1	PMID: 27537488
A14a_a2l	iIN-1	PMID: 27537488
A14a_a2r	iIN-1	PMID: 27537488
A14neo_t3l
A14neo_t3r
A18a_a1l	CLI2	PMID: 27470675
A18a_a1r	CLI2	PMID: 27470675
A18a_a2l	CLI2	PMID: 27470675
A18a_a2r	CLI2	PMID: 27470675
A18b_a1l
A18b_a1r
A18b2_a1l
A18b2_a1r
A18b2_a2l
A18b2_a2r
A18b3_a1l	CLI1	PMID: 27470675
A18b3_a1r	CLI1	PMID: 27470675
A18c?_a2l
A18c?_a2r
A18f?_a2l
A18f?_a2r
A18f?_a3l
A18f?_a3r
A18j_a1l	eIN-1	PMID: 27537488
A18j_a1r	eIN-1	PMID: 27537488
A18j_a2l
A18j_a2r
A18neo_a2l
A18neo_a2r
A19d_a1l
A19d_a1r
A19l_a1l
A19l_a1r
A19l_a2l
A19l_a2r
A23a_a1l
A23a_a1r
A26f_a1l
A26f_a1r
A26f_a2l
A26f_a2r
A26f_a3l
A26f_a3r
A27e(2)_a1l
A27e(2)_a1r
A27h_a1l	GDL	PMID: 26880545
A27h_a1r	GDL	PMID: 26880545
A27h_a2l	GDL	PMID: 26880545
A27h_a2r	GDL	PMID: 26880545
A27j_a1l
A27j_a1r
A27k_a1l	Ifb-B	PMID: 31201326
A27k_a1r	Ifb-B	PMID: 31201326
A27k_a2l	Ifb-B	PMID: 31201326
A27k_a2r	Ifb-B	PMID: 31201326
A27l_a1l
A27l_a1r
A27l_a2l
A27l_a2r
A27n_a1l
A27n_a1r
A27n_a2l
A27n_a2r
A27neo_a1l
A27neo_a1r
A27Uniq_t3l
A27Uniq_t3r
A31b_a1l
A31b_a1r
A31b_a2l
A31b_a2r
A31d_a1l
A31d_a1r
A31k_a1l
A31k_a1r
Descending neuron_SEZ_left
Descending neuron_SEZ_right
Descending pre RP3_t1l
Descending pre RP3_t1r
DLN1_t3l (Baloot-a18/a19)
DLN1_t3r (Baloot-a18/a19)
DLN2_a1l
DLN2_a1r
dsnPMN2_t3l
dsnPMN2_t3r
Premotor 2_RP MNs Descending SePN02b left
Premotor 2_RP MNs Descending SePN02b right
Projection Neuron - right
Projection Neuron-left
T01d1_t3l
T01d1_t3r
T01d2_t3l
T01d2_t3r
T01d4_t3l
T01d4_t3r
T03xyz_t1l
T03xyz_t1r
T06PP?-pre RP3-PMN_t1l
T06PP?-pre RP3-PMN_t1r
T06WW?-pre RP3-PMN_t1l
T06WW?-pre RP3-PMN_t1r
T11v_t3l
T11v_t3r
T27Y_t3l
T27Y_t3r
TGun_t3l
TGun_t3r
Thoracic descending pre-longitudinals_left
Thoracic descending pre-longitudinals_right
Tipsi_t3l
Tipsi_t3r
TJPMN_t3l
TJPMN_t3r
VLELX4_a2l
VLELX4_a2r
