# Supplementary material for: A multilayer circuit architecture for the generation of distinct locomotor behaviors in Drosophila
Source: eLife journal article supplement (doi:10.7554/elife.51781), 2019-12-23
Supplement: supp [file elife-51781-supp-v1.zip › elife_poa_e51781_Supplementary_file_3.xlsx]

## Sheet: Sheet1
PMN	Neurotransmitter identity	References
A01c1_a1l	Chat	PMID: 27537488
A01c1_a1r	Chat	PMID: 27537488
A01c1_a2l	Chat	PMID: 27537488
A01c1_a2r	Chat	PMID: 27537488
A01c2_a1l (ipsi_dendrite)	Chat likely
A01c2_a1r (ipsi_dendrite)	Chat likely
A01c2_a2l (ipsi_dendrite)	Chat likely
A01c2_a2r (ipsi_dendrite)	Chat likely
A01d3_a1l	Chat	PMID: 27537488, PMID: 31201326
A01d3_a1r	Chat	PMID: 27537488, PMID: 31201326
A01d3_t3l (T01d3)	Chat	PMID: 27537488, PMID: 31201326
A01d3_t3r (T01d3)	Chat	PMID: 27537488, PMID: 31201326
A01j_a1l	Chat likely
A01j_a1r	Chat likely
A01x_a1l	Chat likely
A01x_a1r	Chat likely
A01x2_a1l	Chat likely
A01x2_a1r	Chat likely
A01x2_t3l (T01x2)	Chat likely
A01x2_t3r (T01x2)	Chat likely
A01x3_a1l	Chat
A01x3_a1r	Chat
A02b_a1l	Glut	PMID: 25438948
A02b_a1r	Glut	PMID: 25438948
A02e_a1l	Glut	PMID: 25438948
A02e_a1r	Glut	PMID: 25438948
A02f_a1l	Glut	PMID: 25438948
A02f_a1r	Glut	PMID: 25438948
A02g_a1l	Glut	PMID: 25438948
A02g_a1r	Glut	PMID: 25438948
A02g_a2l	Glut	PMID: 25438948
A02g_a2r	Glut	PMID: 25438948
A02h_a1l	Glut	PMID: 25438948
A02h_a1r	Glut	PMID: 25438948
A02i_a1l	Glut	PMID: 25438948
A02i_a1r	Glut	PMID: 25438948
A02i_a2l	Glut	PMID: 25438948
A02i_a2r	Glut	PMID: 25438948
A02i_a3l	Glut	PMID: 25438948
A02i_a3r	Glut	PMID: 25438948
A02j_a3l	Glut	PMID: 25438948
A02j_a3r	Glut	PMID: 25438948
A02m_a1l Pseudolooper-3	Chat likely	PMID: 28803873
A02m_a1r Pseudolooper-3	Chat likely	PMID: 28803873
A02n_a1l Pseudolooper-4	Chat likely	PMID: 28803873
A02n_a1r Pseudolooper-4	Chat likely	PMID: 28803873
A03a1_a1l (pre dMNs)	Chat likely	PMID: 27537488
A03a1_a1r (pre dMNs)	Chat likely	PMID: 27537488
A03a3_a1l (pre dMNs)	Chat likely
A03a3_a1r (pre dMNs)	Chat likely
A03a3_t3l (was T03a1)	Chat likely
A03a3_t3r (was T03a1)	Chat likely
A03a4_a1l	Chat likely	PMID: 27537488
A03a4_a1r	Chat likely	PMID: 27537488
A03a4_a2l	Chat likely	PMID: 27537488
A03a4_a2r	Chat likely	PMID: 27537488
A03a5_a1l	Chat
A03a5_a1r	Chat
A03a6_a1l	Chat likely
A03a6_a1r	Chat likely
a03d/e_a1l	Chat likely
a03d/e_a1r	Chat likely
a03d/e_a2l	Chat likely
a03d/e_a2r	Chat likely
A03EGB_a2l (EGHBAL)	Chat likely
A03EGB_a2r (EGHBAL)	Chat likely
A03g_a1l	Chat
A03g_a1r	Chat
A03g_t3l (T03g)	Chat
A03g_t3r (T03g)	Chat
A03g2_t3l (T03g2)	Chat likely
A03g2_t3r (T03g2)	Chat likely
A03o_a2l	Chat likely
A03o_a2l	Chat likely
A03SNC_a2l	Chat likely
A03SNC_a2r	Chat likely
A03SNC_a3l	Chat likely
A03SNC_a3r	Chat likely
A03xKT_a1l	Chat likely
A03xKT_a1r	Chat likely
A05a_a1l	no Gal4 markers; can't assay
A05a_a1r	no Gal4 markers; can't assay
A05a_t3l	no Gal4 markers; can't assay
A05a_t3r	no Gal4 markers; can't assay
A05k_a1l	no Gal4 markers; can't assay
A05k_a1r	no Gal4 markers; can't assay
A06a_a1l	GABA
A06a_a1r	GABA
A06c_a1l	GABA
A06c_a1r	GABA
A06e_a1l (Saaghi-3)	GABA Likely
A06e_a1r (Saaghi-3)	GABA Likely
A06e_t3l (Saaghi-3)	GABA Likely
A06e_t3r (Saaghi-3)	GABA Likely
A06f_a1l (Saaghi-2)	GABA Likely
A06f_a1r (Saaghi-2)	GABA Likely
A06f_t3l (Saaghi-2)	GABA Likely
A06f_t3r (Saaghi-2)	GABA Likely
A06g2_a1l (Saaghi-5)	GABA Likely
A06g2_a1r (Saaghi-5)	GABA Likely
A06l_a1l (Saaghi-1)	GABA
A06l_a1r (Saaghi-1)	GABA
A06m_a1l	GABA Likely
A06m_a1r	GABA Likely
A06x1_a1l	GABA Likely
A06x1_a1r	GABA Likely
A06x1_a2l	GABA Likely
A06x1_a2r	GABA Likely
A07f2_a1l (marathon)	no Gal4 markers; can't assay
A07f2_a1r (marathon)	no Gal4 markers; can't assay
A08e1_a1l	Chat	PMID: 26439528
A08e1_a1r	Chat	PMID: 26439528
A09l_a1l (Down-and-back-1)	Chat	PMID: 29528286
A09l_a1r (Down-and-back-1)	Chat	PMID: 29528286
A10a_a1l Chair-1	no Gal4 markers; can't assay
A10a_a1r Chair-1	no Gal4 markers; can't assay
A10a_a2l Chair-1	no Gal4 markers; can't assay
A10a_a2r Chair-1	no Gal4 markers; can't assay
A10e_a2l	no Gal4 markers; can't assay
A10e_a2r	no Gal4 markers; can't assay
A14a_a1l	GABA	PMID: 27537488
A14a_a1r	GABA	PMID: 27537488
A14a_a2l	GABA	PMID: 27537488
A14a_a2r	GABA	PMID: 27537488
A14neo_t3l	GABA Likely
A14neo_t3r	GABA Likely
A18a_a1l	Chat	PMID: 27470675
A18a_a1r	Chat	PMID: 27470675
A18a_a2l	Chat	PMID: 27470675
A18a_a2r	Chat	PMID: 27470675
A18b_a1l	Chat
A18b_a1r	Chat
A18b2_a1l	Chat likely
A18b2_a1r	Chat likely
A18b2_a2l	Chat likely
A18b2_a2r	Chat likely
A18b3_a1l	Chat	PMID: 27470675
A18b3_a1r	Chat	PMID: 27470675
A18c?_a2l	Chat likely
A18c?_a2r	Chat likely
A18f?_a2l	Chat likely
A18f?_a2r	Chat likely
A18f?_a3l	Chat likely
A18f?_a3r	Chat likely
A18j_a1l	Chat	PMID: 27537488
A18j_a1r	Chat	PMID: 27537488
A18j_a2l	Chat	PMID: 27537488
A18j_a2r	Chat	PMID: 27537488
A18neo_a2l	Chat likely
A18neo_a2r	Chat likely
A19d_a1l	no Gal4 markers; can't assay
A19d_a1r	no Gal4 markers; can't assay
A19l_a1l	GABA
A19l_a1r	GABA
A19l_a2l	GABA
A19l_a2r	GABA
A23a_a1l	GABA
A23a_a1r	GABA
A26f_a1l	neuromodulatory corazonin
A26f_a1r	neuromodulatory corazonin
A26f_a2l	neuromodulatory corazonin
A26f_a2r	neuromodulatory corazonin
A26f_a3l	neuromodulatory corazonin
A26f_a3r	neuromodulatory corazonin
A27e(2)_a1l	no Gal4 markers; can't assay
A27e(2)_a1r	no Gal4 markers; can't assay
A27h_a1l	Chat	PMID: 26880545
A27h_a1r	Chat	PMID: 26880545
A27h_a2l	Chat	PMID: 26880545
A27h_a2r	Chat	PMID: 26880545
A27j_a1l	GABA
A27j_a1r	GABA
A27k_a1l	Chat	PMID: 31201326
A27k_a1r	Chat	PMID: 31201326
A27k_a2l	Chat	PMID: 31201326
A27k_a2r	Chat	PMID: 31201326
A27l_a1l	GABA
A27l_a1r	GABA
A27l_a2l	GABA
A27l_a2r	GABA
A27n_a1l	no Gal4 markers; can't assay
A27n_a1r	no Gal4 markers; can't assay
A27n_a2l	no Gal4 markers; can't assay
A27n_a2r	no Gal4 markers; can't assay
A27neo_a1l	no Gal4 markers; can't assay
A27neo_a1r	no Gal4 markers; can't assay
A27Uniq_t3l	no Gal4 markers; can't assay
A27Uniq_t3r	no Gal4 markers; can't assay
A31b_a1l	GABA
A31b_a1r	GABA
A31b_a2l	GABA
A31b_a2r	GABA
A31d_a1l	no Gal4 markers; can't assay
A31d_a1r	no Gal4 markers; can't assay
A31k_a1l	GABA
A31k_a1r	GABA
Descending neuron_SEZ_left	no Gal4 markers; can't assay
Descending neuron_SEZ_right	no Gal4 markers; can't assay
Descending pre RP3_t1l	no Gal4 markers; can't assay
Descending pre RP3_t1r	no Gal4 markers; can't assay
DLN1_t3l (Baloot-a18/a19)	no Gal4 markers; can't assay
DLN1_t3r (Baloot-a18/a19)	no Gal4 markers; can't assay
DLN2_a1l	no Gal4 markers; can't assay
DLN2_a1r	no Gal4 markers; can't assay
dsnPMN2_t3l	no Gal4 markers; can't assay
dsnPMN2_t3r	no Gal4 markers; can't assay
Premotor 2_RP MNs Descending SePN02b left	no Gal4 markers; can't assay
Premotor 2_RP MNs Descending SePN02b right	no Gal4 markers; can't assay
Projection Neuron - right	no Gal4 markers; can't assay
Projection Neuron-left	no Gal4 markers; can't assay
T01d1_t3l	Chat likely
T01d1_t3r	Chat likely
T01d2_t3l	Chat likely
T01d2_t3r	Chat likely
T01d4_t3l	Chat likely
T01d4_t3r	Chat likely
T03xyz_t1l	no Gal4 markers; can't assay
T03xyz_t1r	no Gal4 markers; can't assay
T06PP?-pre RP3-PMN_t1l	no Gal4 markers; can't assay
T06PP?-pre RP3-PMN_t1r	no Gal4 markers; can't assay
T06WW?-pre RP3-PMN_t1l	no Gal4 markers; can't assay
T06WW?-pre RP3-PMN_t1r	no Gal4 markers; can't assay
T11v_t3l	no Gal4 markers; can't assay
T11v_t3r	no Gal4 markers; can't assay
T27Y_t3l	no Gal4 markers; can't assay
T27Y_t3r	no Gal4 markers; can't assay
TGun_t3l	no Gal4 markers; can't assay
TGun_t3r	no Gal4 markers; can't assay
Thoracic descending pre-longitudinals_left	no Gal4 markers; can't assay
Thoracic descending pre-longitudinals_right	no Gal4 markers; can't assay
Tipsi_t3l	no Gal4 markers; can't assay
Tipsi_t3r	no Gal4 markers; can't assay
TJPMN_t3l	no Gal4 markers; can't assay
TJPMN_t3r	no Gal4 markers; can't assay
VLELX4_a2l	no Gal4 markers; can't assay
VLELX4_a2r	no Gal4 markers; can't assay
