# Supplementary material for: A multilayer circuit architecture for the generation of distinct locomotor behaviors in Drosophila
Source: eLife journal article supplement (doi:10.7554/elife.51781), 2019-12-23
Supplement: supp [file elife-51781-supp-v1.zip › elife_poa_e51781_Supplementary_file_4.unk]

[
 {
  "skeleton_id": 4113533,
  "color": "#ffff00",
  "opacity": 1
 },
 {
  "skeleton_id": 4936149,
  "color": "#ffff00",
  "opacity": 1
 },
 {
  "skeleton_id": 4778699,
  "color": "#ffff00",
  "opacity": 1
 },
 {
  "skeleton_id": 6951025,
  "color": "#ffff00",
  "opacity": 1
 },
 {
  "skeleton_id": 5084467,
  "color": "#ffff00",
  "opacity": 1
 },
 {
  "skeleton_id": 16226512,
  "color": "#ffff00",
  "opacity": 1
 },
 {
  "skeleton_id": 4618412,
  "color": "#ffff00",
  "opacity": 1
 },
 {
  "skeleton_id": 6954833,
  "color": "#ffff00",
  "opacity": 1
 },
 {
  "skeleton_id": 3995976,
  "color": "#ffff00",
  "opacity": 1
 },
 {
  "skeleton_id": 17872154,
  "color": "#ffff00",
  "opacity": 1
 },
 {
  "skeleton_id": 14826752,
  "color": "#ffff00",
  "opacity": 1
 },
 {
  "skeleton_id": 4731383,
  "color": "#ffff00",
  "opacity": 1
 },
 {
  "skeleton_id": 1100936,
  "color": "#ffff00",
  "opacity": 1
 },
 {
  "skeleton_id": 4789092,
  "color": "#ffff00",
  "opacity": 1
 },
 {
  "skeleton_id": 4123145,
  "color": "#ffff00",
  "opacity": 1
 },
 {
  "skeleton_id": 4038469,
  "color": "#ffff00",
  "opacity": 1
 },
 {
  "skeleton_id": 11106522,
  "color": "#ffff00",
  "opacity": 1
 },
 {
  "skeleton_id": 10312570,
  "color": "#ffff00",
  "opacity": 1
 },
 {
  "skeleton_id": 4840830,
  "color": "#ffff00",
  "opacity": 1
 },
 {
  "skeleton_id": 12096730,
  "color": "#ffff00",
  "opacity": 1
 },
 {
  "skeleton_id": 9544992,
  "color": "#ffff00",
  "opacity": 1
 },
 {
  "skeleton_id": 6811349,
  "color": "#ffff00",
  "opacity": 1
 },
 {
  "skeleton_id": 6578062,
  "color": "#ffff00",
  "opacity": 1
 },
 {
  "skeleton_id": 15233041,
  "color": "#ffff00",
  "opacity": 1
 },
 {
  "skeleton_id": 7992966,
  "color": "#ffff00",
  "opacity": 1
 },
 {
  "skeleton_id": 14858626,
  "color": "#ffff00",
  "opacity": 1
 },
 {
  "skeleton_id": 4071032,
  "color": "#ffff00",
  "opacity": 1
 },
 {
  "skeleton_id": 12953345,
  "color": "#ffff00",
  "opacity": 1
 },
 {
  "skeleton_id": 14866842,
  "color": "#ffff00",
  "opacity": 1
 },
 {
  "skeleton_id": 18145093,
  "color": "#ffff00",
  "opacity": 1
 },
 {
  "skeleton_id": 14293495,
  "color": "#ffff00",
  "opacity": 1
 },
 {
  "skeleton_id": 4387977,
  "color": "#ffff00",
  "opacity": 1
 },
 {
  "skeleton_id": 12820178,
  "color": "#ffff00",
  "opacity": 1
 },
 {
  "skeleton_id": 14866379,
  "color": "#ffff00",
  "opacity": 1
 },
 {
  "skeleton_id": 2798040,
  "color": "#ffff00",
  "opacity": 1
 },
 {
  "skeleton_id": 5057361,
  "color": "#ffff00",
  "opacity": 1
 },
 {
  "skeleton_id": 16326658,
  "color": "#ffff00",
  "opacity": 1
 },
 {
  "skeleton_id": 14946016,
  "color": "#ffff00",
  "opacity": 1
 },
 {
  "skeleton_id": 1804947,
  "color": "#ffff00",
  "opacity": 1
 },
 {
  "skeleton_id": 3307004,
  "color": "#ffff00",
  "opacity": 1
 },
 {
  "skeleton_id": 16274373,
  "color": "#ffff00",
  "opacity": 1
 },
 {
  "skeleton_id": 7926496,
  "color": "#ffff00",
  "opacity": 1
 },
 {
  "skeleton_id": 4778439,
  "color": "#ffff00",
  "opacity": 1
 },
 {
  "skeleton_id": 3546334,
  "color": "#ffff00",
  "opacity": 1
 },
 {
  "skeleton_id": 3546835,
  "color": "#ffff00",
  "opacity": 1
 },
 {
  "skeleton_id": 2637812,
  "color": "#ffff00",
  "opacity": 1
 },
 {
  "skeleton_id": 4728865,
  "color": "#ffff00",
  "opacity": 1
 },
 {
  "skeleton_id": 4541716,
  "color": "#ffff00",
  "opacity": 1
 },
 {
  "skeleton_id": 12704772,
  "color": "#ffff00",
  "opacity": 1
 },
 {
  "skeleton_id": 12683525,
  "color": "#ffff00",
  "opacity": 1
 },
 {
  "skeleton_id": 14242929,
  "color": "#ffff00",
  "opacity": 1
 },
 {
  "skeleton_id": 4538681,
  "color": "#ffff00",
  "opacity": 1
 },
 {
  "skeleton_id": 8688631,
  "color": "#ffff00",
  "opacity": 1
 },
 {
  "skeleton_id": 4543281,
  "color": "#ffff00",
  "opacity": 1
 },
 {
  "skeleton_id": 12643185,
  "color": "#ffff00",
  "opacity": 1
 },
 {
  "skeleton_id": 13525684,
  "color": "#ffff00",
  "opacity": 1
 },
 {
  "skeleton_id": 5904833,
  "color": "#ffff00",
  "opacity": 1
 },
 {
  "skeleton_id": 5297998,
  "color": "#ffff00",
  "opacity": 1
 },
 {
  "skeleton_id": 10089193,
  "color": "#ffff00",
  "opacity": 1
 },
 {
  "skeleton_id": 16257962,
  "color": "#ffff00",
  "opacity": 1
 },
 {
  "skeleton_id": 6570401,
  "color": "#ffff00",
  "opacity": 1
 },
 {
  "skeleton_id": 8263821,
  "color": "#ffff00",
  "opacity": 1
 },
 {
  "skeleton_id": 12901480,
  "color": "#ffff00",
  "opacity": 1
 },
 {
  "skeleton_id": 4847161,
  "color": "#ffff00",
  "opacity": 1
 },
 {
  "skeleton_id": 10089252,
  "color": "#ffff00",
  "opacity": 1
 },
 {
  "skeleton_id": 4848300,
  "color": "#ffff00",
  "opacity": 1
 },
 {
  "skeleton_id": 5309932,
  "color": "#ffff00",
  "opacity": 1
 },
 {
  "skeleton_id": 10855206,
  "color": "#ffff00",
  "opacity": 1
 },
 {
  "skeleton_id": 12968171,
  "color": "#ffff00",
  "opacity": 1
 },
 {
  "skeleton_id": 20575657,
  "color": "#ffff00",
  "opacity": 1
 },
 {
  "skeleton_id": 20698587,
  "color": "#ffff00",
  "opacity": 1
 },
 {
  "skeleton_id": 7987962,
  "color": "#ffff00",
  "opacity": 1
 },
 {
  "skeleton_id": 4054001,
  "color": "#ffff00",
  "opacity": 1
 },
 {
  "skeleton_id": 5777494,
  "color": "#ffff00",
  "opacity": 1
 },
 {
  "skeleton_id": 13123069,
  "color": "#ffff00",
  "opacity": 1
 },
 {
  "skeleton_id": 4847405,
  "color": "#ffff00",
  "opacity": 1
 },
 {
  "skeleton_id": 4721016,
  "color": "#ffff00",
  "opacity": 1
 },
 {
  "skeleton_id": 1809951,
  "color": "#ffff00",
  "opacity": 1
 },
 {
  "skeleton_id": 16240665,
  "color": "#ffff00",
  "opacity": 1
 },
 {
  "skeleton_id": 15290305,
  "color": "#ffff00",
  "opacity": 1
 },
 {
  "skeleton_id": 13522678,
  "color": "#ffff00",
  "opacity": 1
 },
 {
  "skeleton_id": 5351821,
  "color": "#ffff00",
  "opacity": 1
 },
 {
  "skeleton_id": 18427863,
  "color": "#ffff00",
  "opacity": 1
 },
 {
  "skeleton_id": 10492631,
  "color": "#ffff00",
  "opacity": 1
 },
 {
  "skeleton_id": 4990880,
  "color": "#ffff00",
  "opacity": 1
 },
 {
  "skeleton_id": 10053304,
  "color": "#ffff00",
  "opacity": 1
 },
 {
  "skeleton_id": 10858401,
  "color": "#ffff00",
  "opacity": 1
 },
 {
  "skeleton_id": 4034528,
  "color": "#ffff00",
  "opacity": 1
 },
 {
  "skeleton_id": 12809976,
  "color": "#ffff00",
  "opacity": 1
 },
 {
  "skeleton_id": 7280270,
  "color": "#ffff00",
  "opacity": 1
 },
 {
  "skeleton_id": 10474936,
  "color": "#ffff00",
  "opacity": 1
 },
 {
  "skeleton_id": 11958584,
  "color": "#ffff00",
  "opacity": 1
 },
 {
  "skeleton_id": 20725667,
  "color": "#ffff00",
  "opacity": 1
 },
 {
  "skeleton_id": 11065546,
  "color": "#ffff00",
  "opacity": 1
 },
 {
  "skeleton_id": 4386719,
  "color": "#ffff00",
  "opacity": 1
 },
 {
  "skeleton_id": 12036009,
  "color": "#ffff00",
  "opacity": 1
 },
 {
  "skeleton_id": 5357465,
  "color": "#ffff00",
  "opacity": 1
 },
 {
  "skeleton_id": 4037028,
  "color": "#ffff00",
  "opacity": 1
 },
 {
  "skeleton_id": 12039793,
  "color": "#ffff00",
  "opacity": 1
 },
 {
  "skeleton_id": 5452198,
  "color": "#ffff00",
  "opacity": 1
 },
 {
  "skeleton_id": 18418512,
  "color": "#ffff00",
  "opacity": 1
 },
 {
  "skeleton_id": 17435371,
  "color": "#ffff00",
  "opacity": 1
 },
 {
  "skeleton_id": 8235049,
  "color": "#ffff00",
  "opacity": 1
 },
 {
  "skeleton_id": 15264419,
  "color": "#ffff00",
  "opacity": 1
 },
 {
  "skeleton_id": 4542822,
  "color": "#ffff00",
  "opacity": 1
 },
 {
  "skeleton_id": 4478328,
  "color": "#ffff00",
  "opacity": 1
 },
 {
  "skeleton_id": 12785920,
  "color": "#ffff00",
  "opacity": 1
 },
 {
  "skeleton_id": 15718351,
  "color": "#ffff00",
  "opacity": 1
 },
 {
  "skeleton_id": 13331383,
  "color": "#ffff00",
  "opacity": 1
 },
 {
  "skeleton_id": 4725907,
  "color": "#ffff00",
  "opacity": 1
 },
 {
  "skeleton_id": 7876385,
  "color": "#ffff00",
  "opacity": 1
 },
 {
  "skeleton_id": 8198957,
  "color": "#ffff00",
  "opacity": 1
 },
 {
  "skeleton_id": 12468812,
  "color": "#ffff00",
  "opacity": 1
 },
 {
  "skeleton_id": 4102844,
  "color": "#ffff00",
  "opacity": 1
 },
 {
  "skeleton_id": 6535161,
  "color": "#ffff00",
  "opacity": 1
 },
 {
  "skeleton_id": 5690362,
  "color": "#ffff00",
  "opacity": 1
 },
 {
  "skeleton_id": 2583770,
  "color": "#ffff00",
  "opacity": 1
 },
 {
  "skeleton_id": 12767923,
  "color": "#ffff00",
  "opacity": 1
 },
 {
  "skeleton_id": 4541202,
  "color": "#ffff00",
  "opacity": 1
 },
 {
  "skeleton_id": 4935973,
  "color": "#ffff00",
  "opacity": 1
 },
 {
  "skeleton_id": 12820277,
  "color": "#ffff00",
  "opacity": 1
 },
 {
  "skeleton_id": 5298032,
  "color": "#ffff00",
  "opacity": 1
 },
 {
  "skeleton_id": 4593030,
  "color": "#ffff00",
  "opacity": 1
 },
 {
  "skeleton_id": 4191349,
  "color": "#ffff00",
  "opacity": 1
 },
 {
  "skeleton_id": 3633308,
  "color": "#ffff00",
  "opacity": 1
 },
 {
  "skeleton_id": 12826486,
  "color": "#ffff00",
  "opacity": 1
 },
 {
  "skeleton_id": 10642320,
  "color": "#ffff00",
  "opacity": 1
 },
 {
  "skeleton_id": 4991402,
  "color": "#ffff00",
  "opacity": 1
 },
 {
  "skeleton_id": 16039981,
  "color": "#ffff00",
  "opacity": 1
 },
 {
  "skeleton_id": 15600832,
  "color": "#ffff00",
  "opacity": 1
 },
 {
  "skeleton_id": 4542433,
  "color": "#ffff00",
  "opacity": 1
 },
 {
  "skeleton_id": 4727546,
  "color": "#ffff00",
  "opacity": 1
 },
 {
  "skeleton_id": 18425292,
  "color": "#ffff00",
  "opacity": 1
 },
 {
  "skeleton_id": 4070588,
  "color": "#ffff00",
  "opacity": 1
 },
 {
  "skeleton_id": 5355271,
  "color": "#ffff00",
  "opacity": 1
 },
 {
  "skeleton_id": 16512969,
  "color": "#ffff00",
  "opacity": 1
 },
 {
  "skeleton_id": 4730042,
  "color": "#ffff00",
  "opacity": 1
 },
 {
  "skeleton_id": 16515841,
  "color": "#ffff00",
  "opacity": 1
 },
 {
  "skeleton_id": 11064709,
  "color": "#ffff00",
  "opacity": 1
 },
 {
  "skeleton_id": 8192600,
  "color": "#ffff00",
  "opacity": 1
 },
 {
  "skeleton_id": 4390340,
  "color": "#ffff00",
  "opacity": 1
 },
 {
  "skeleton_id": 3674460,
  "color": "#ffff00",
  "opacity": 1
 },
 {
  "skeleton_id": 4850740,
  "color": "#ffff00",
  "opacity": 1
 },
 {
  "skeleton_id": 13302529,
  "color": "#ffff00",
  "opacity": 1
 },
 {
  "skeleton_id": 5078760,
  "color": "#ffff00",
  "opacity": 1
 },
 {
  "skeleton_id": 16690920,
  "color": "#ffff00",
  "opacity": 1
 },
 {
  "skeleton_id": 4780637,
  "color": "#ffff00",
  "opacity": 1
 },
 {
  "skeleton_id": 3673274,
  "color": "#ffff00",
  "opacity": 1
 },
 {
  "skeleton_id": 4543184,
  "color": "#ffff00",
  "opacity": 1
 },
 {
  "skeleton_id": 15546090,
  "color": "#ffff00",
  "opacity": 1
 },
 {
  "skeleton_id": 19820800,
  "color": "#ffff00",
  "opacity": 1
 },
 {
  "skeleton_id": 15101511,
  "color": "#ffff00",
  "opacity": 1
 },
 {
  "skeleton_id": 5358138,
  "color": "#ffff00",
  "opacity": 1
 },
 {
  "skeleton_id": 4978454,
  "color": "#ffff00",
  "opacity": 1
 },
 {
  "skeleton_id": 3989801,
  "color": "#ffff00",
  "opacity": 1
 },
 {
  "skeleton_id": 4722991,
  "color": "#ffff00",
  "opacity": 1
 },
 {
  "skeleton_id": 4538738,
  "color": "#ffff00",
  "opacity": 1
 },
 {
  "skeleton_id": 4729046,
  "color": "#ffff00",
  "opacity": 1
 },
 {
  "skeleton_id": 13258642,
  "color": "#ffff00",
  "opacity": 1
 },
 {
  "skeleton_id": 17071666,
  "color": "#ffff00",
  "opacity": 1
 },
 {
  "skeleton_id": 8748462,
  "color": "#ffff00",
  "opacity": 1
 },
 {
  "skeleton_id": 18520222,
  "color": "#ffff00",
  "opacity": 1
 },
 {
  "skeleton_id": 4780447,
  "color": "#ffff00",
  "opacity": 1
 },
 {
  "skeleton_id": 1711076,
  "color": "#ffff00",
  "opacity": 1
 },
 {
  "skeleton_id": 10090269,
  "color": "#ffff00",
  "opacity": 1
 },
 {
  "skeleton_id": 15290335,
  "color": "#ffff00",
  "opacity": 1
 },
 {
  "skeleton_id": 10223572,
  "color": "#ffff00",
  "opacity": 1
 },
 {
  "skeleton_id": 10398171,
  "color": "#ffff00",
  "opacity": 1
 },
 {
  "skeleton_id": 10414725,
  "color": "#ffff00",
  "opacity": 1
 },
 {
  "skeleton_id": 10376512,
  "color": "#ffff00",
  "opacity": 1
 },
 {
  "skeleton_id": 17904627,
  "color": "#ffff00",
  "opacity": 1
 },
 {
  "skeleton_id": 10015769,
  "color": "#ffff00",
  "opacity": 1
 },
 {
  "skeleton_id": 4213417,
  "color": "#ffff00",
  "opacity": 1
 },
 {
  "skeleton_id": 10004243,
  "color": "#ffff00",
  "opacity": 1
 },
 {
  "skeleton_id": 4038808,
  "color": "#ffff00",
  "opacity": 1
 },
 {
  "skeleton_id": 4113612,
  "color": "#ffff00",
  "opacity": 1
 },
 {
  "skeleton_id": 10219170,
  "color": "#ffff00",
  "opacity": 1
 },
 {
  "skeleton_id": 10499711,
  "color": "#ffff00",
  "opacity": 1
 },
 {
  "skeleton_id": 4719759,
  "color": "#ffff00",
  "opacity": 1
 },
 {
  "skeleton_id": 5355175,
  "color": "#ffff00",
  "opacity": 1
 },
 {
  "skeleton_id": 7934159,
  "color": "#ffff00",
  "opacity": 1
 },
 {
  "skeleton_id": 4124563,
  "color": "#ffff00",
  "opacity": 1
 },
 {
  "skeleton_id": 4978116,
  "color": "#ffff00",
  "opacity": 1
 },
 {
  "skeleton_id": 4861390,
  "color": "#ffff00",
  "opacity": 1
 },
 {
  "skeleton_id": 10058316,
  "color": "#ffff00",
  "opacity": 1
 },
 {
  "skeleton_id": 4113595,
  "color": "#ffff00",
  "opacity": 1
 },
 {
  "skeleton_id": 11323022,
  "color": "#ffff00",
  "opacity": 1
 },
 {
  "skeleton_id": 16067382,
  "color": "#ffff00",
  "opacity": 1
 },
 {
  "skeleton_id": 12705004,
  "color": "#ffff00",
  "opacity": 1
 },
 {
  "skeleton_id": 8899200,
  "color": "#ffff00",
  "opacity": 1
 },
 {
  "skeleton_id": 5916237,
  "color": "#ffff00",
  "opacity": 1
 },
 {
  "skeleton_id": 4627823,
  "color": "#ffff00",
  "opacity": 1
 },
 {
  "skeleton_id": 12809152,
  "color": "#ffff00",
  "opacity": 1
 },
 {
  "skeleton_id": 12873722,
  "color": "#ffff00",
  "opacity": 1
 },
 {
  "skeleton_id": 15571023,
  "color": "#ffff00",
  "opacity": 1
 },
 {
  "skeleton_id": 12944478,
  "color": "#ffff00",
  "opacity": 1
 },
 {
  "skeleton_id": 6124763,
  "color": "#ffff00",
  "opacity": 1
 },
 {
  "skeleton_id": 6082738,
  "color": "#ffff00",
  "opacity": 1
 },
 {
  "skeleton_id": 654210,
  "color": "#ffff00",
  "opacity": 1
 },
 {
  "skeleton_id": 6139132,
  "color": "#ffff00",
  "opacity": 1
 },
 {
  "skeleton_id": 15552753,
  "color": "#ffff00",
  "opacity": 1
 },
 {
  "skeleton_id": 20627000,
  "color": "#ffff00",
  "opacity": 1
 },
 {
  "skeleton_id": 7867016,
  "color": "#ffff00",
  "opacity": 1
 },
 {
  "skeleton_id": 15094230,
  "color": "#ffff00",
  "opacity": 1
 },
 {
  "skeleton_id": 4789016,
  "color": "#ffff00",
  "opacity": 1
 },
 {
  "skeleton_id": 15693936,
  "color": "#ffff00",
  "opacity": 1
 },
 {
  "skeleton_id": 11833433,
  "color": "#ffff00",
  "opacity": 1
 },
 {
  "skeleton_id": 3962630,
  "color": "#ffff00",
  "opacity": 1
 },
 {
  "skeleton_id": 1182579,
  "color": "#ffff00",
  "opacity": 1
 },
 {
  "skeleton_id": 1706711,
  "color": "#ffff00",
  "opacity": 1
 },
 {
  "skeleton_id": 4104476,
  "color": "#ffff00",
  "opacity": 1
 },
 {
  "skeleton_id": 10185585,
  "color": "#ffff00",
  "opacity": 1
 },
 {
  "skeleton_id": 4123487,
  "color": "#ffff00",
  "opacity": 1
 },
 {
  "skeleton_id": 4584506,
  "color": "#ffff00",
  "opacity": 1
 },
 {
  "skeleton_id": 12949240,
  "color": "#ffff00",
  "opacity": 1
 },
 {
  "skeleton_id": 4732074,
  "color": "#ffff00",
  "opacity": 1
 },
 {
  "skeleton_id": 10578372,
  "color": "#ffff00",
  "opacity": 1
 },
 {
  "skeleton_id": 7987227,
  "color": "#ffff00",
  "opacity": 1
 },
 {
  "skeleton_id": 16864248,
  "color": "#ffff00",
  "opacity": 1
 },
 {
  "skeleton_id": 7014569,
  "color": "#ffff00",
  "opacity": 1
 },
 {
  "skeleton_id": 16864191,
  "color": "#ffff00",
  "opacity": 1
 },
 {
  "skeleton_id": 6894697,
  "color": "#ffff00",
  "opacity": 1
 },
 {
  "skeleton_id": 4402892,
  "color": "#ffff00",
  "opacity": 1
 },
 {
  "skeleton_id": 13526756,
  "color": "#ffff00",
  "opacity": 1
 },
 {
  "skeleton_id": 4929679,
  "color": "#ffff00",
  "opacity": 1
 },
 {
  "skeleton_id": 6459989,
  "color": "#ffff00",
  "opacity": 1
 },
 {
  "skeleton_id": 8181363,
  "color": "#ffff00",
  "opacity": 1
 },
 {
  "skeleton_id": 4888945,
  "color": "#ffff00",
  "opacity": 1
 },
 {
  "skeleton_id": 4539147,
  "color": "#ffff00",
  "opacity": 1
 },
 {
  "skeleton_id": 10647223,
  "color": "#ffff00",
  "opacity": 1
 },
 {
  "skeleton_id": 10467389,
  "color": "#ffff00",
  "opacity": 1
 },
 {
  "skeleton_id": 15290636,
  "color": "#ffff00",
  "opacity": 1
 },
 {
  "skeleton_id": 4523143,
  "color": "#ffff00",
  "opacity": 1
 },
 {
  "skeleton_id": 16767384,
  "color": "#ffff00",
  "opacity": 1
 },
 {
  "skeleton_id": 18459519,
  "color": "#ffff00",
  "opacity": 1
 },
 {
  "skeleton_id": 4728745,
  "color": "#ffff00",
  "opacity": 1
 }
]
