# Supplementary figures and images for: A multilayer circuit architecture for the generation of distinct locomotor behaviors in Drosophila
Source: eLife journal article supplement (doi:10.7554/elife.51781), 2019-12-23

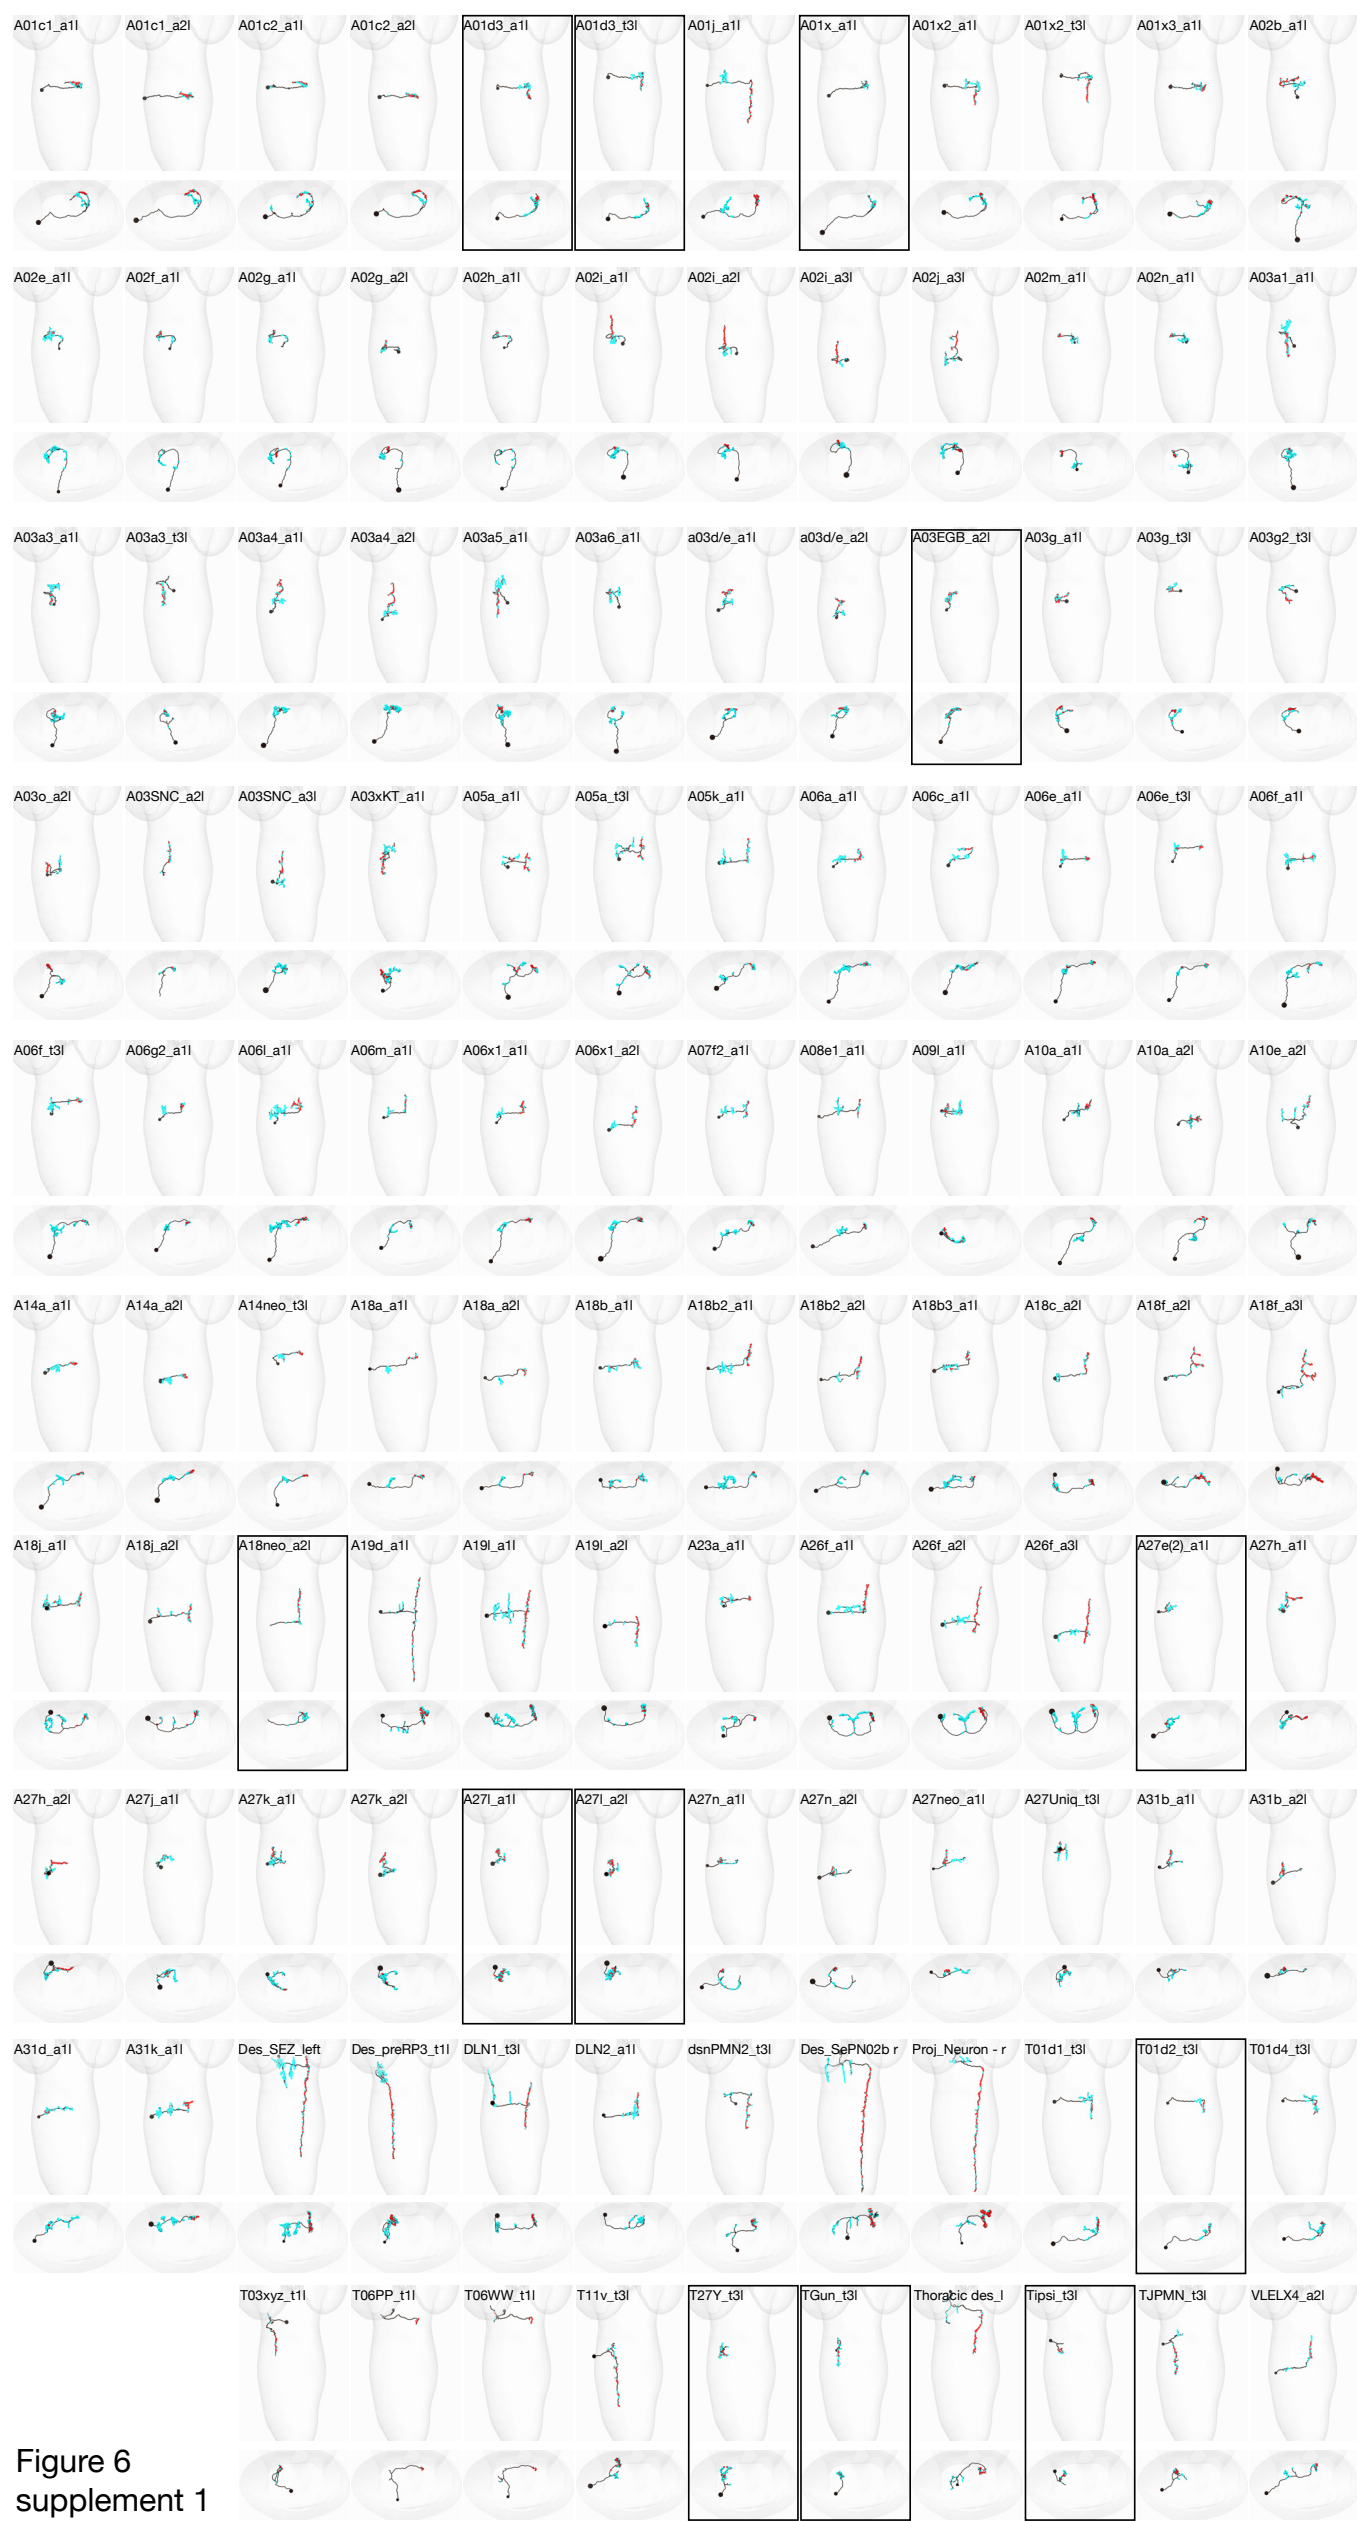

Figure 6  
supplement 1

Supplement: supp [file elife-51781-supp-v1.zip]

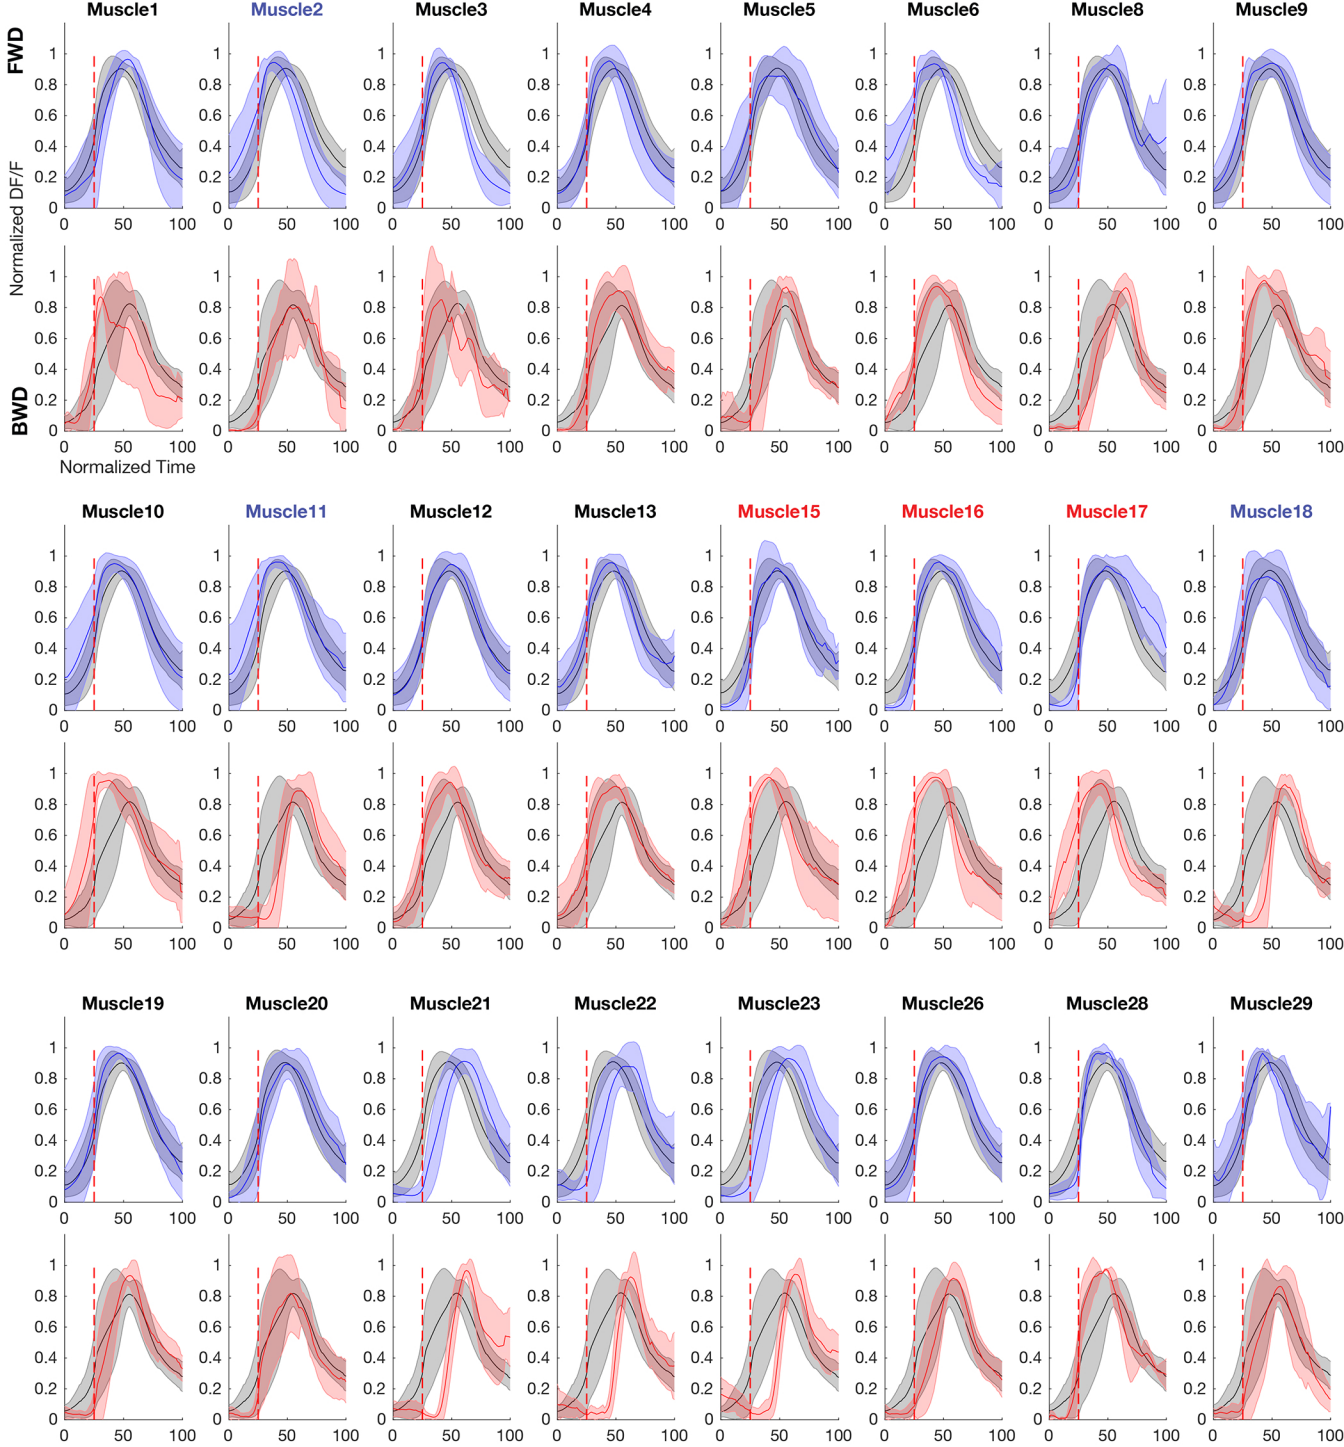

Figure 3 -- supplement 2

Supplement: supp [file elife-51781-supp-v1.zip]

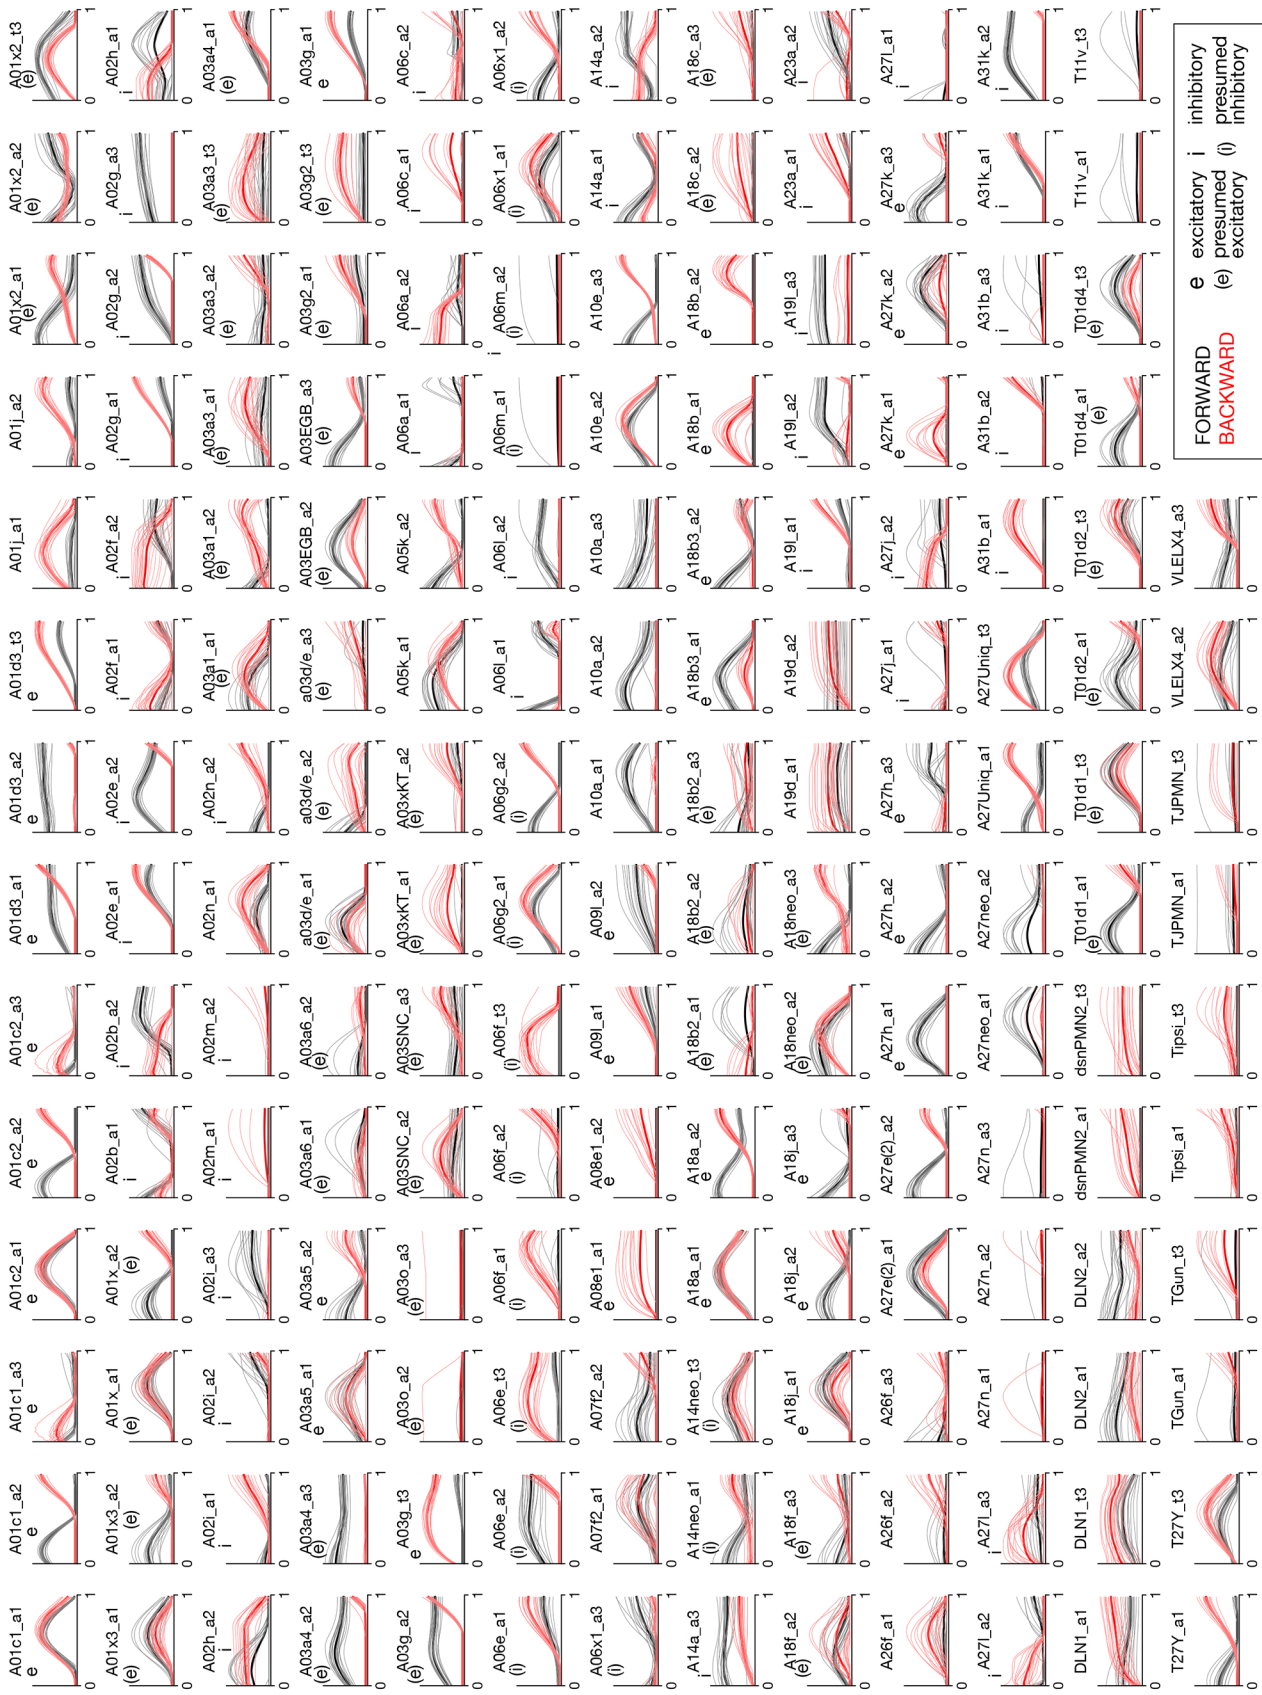

Figure 9 supp 1

Supplement: supp [file elife-51781-supp-v1.zip]

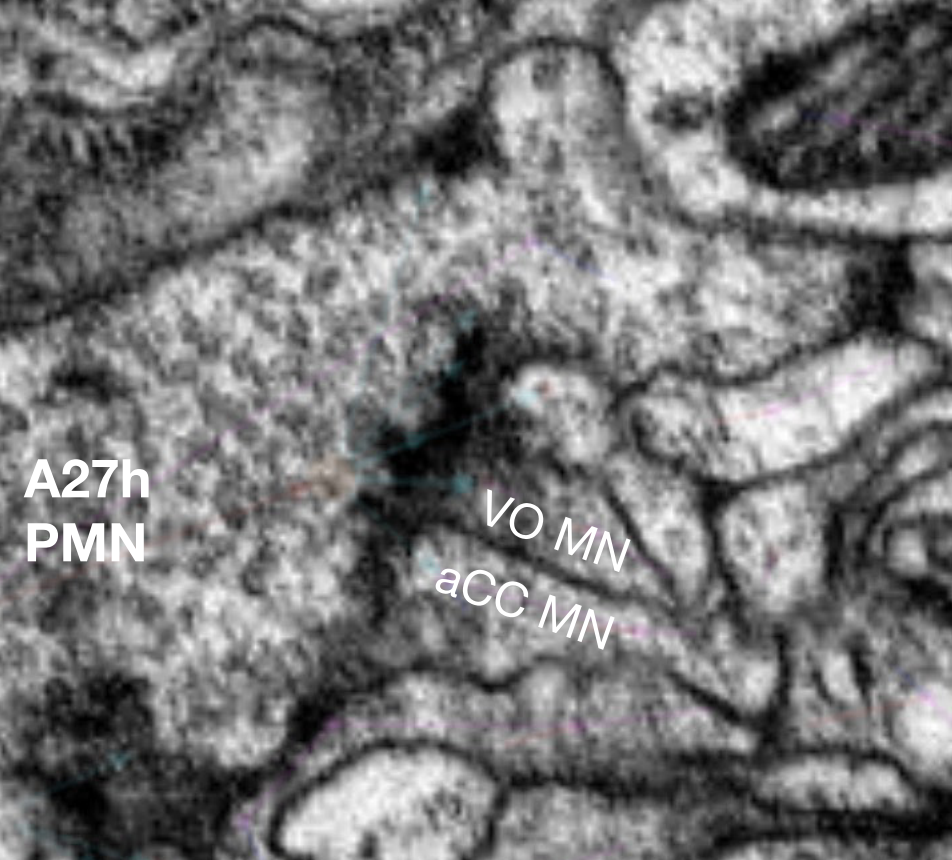

Figure 6 -- supplement 2

Supplement: supp [file elife-51781-supp-v1.zip]

A27h\_a1

A18b\_a1

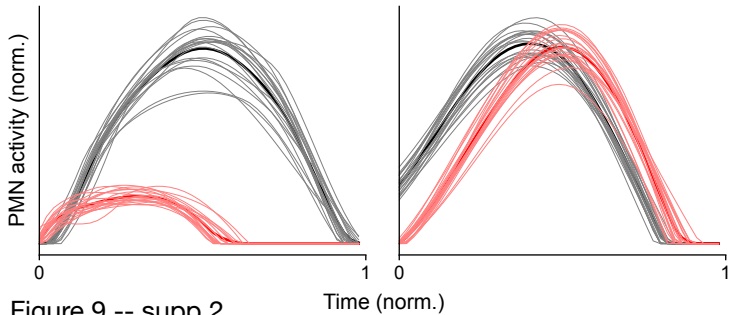

Figure 9 -- supp 2

Supplement: supp [file elife-51781-supp-v1.zip]

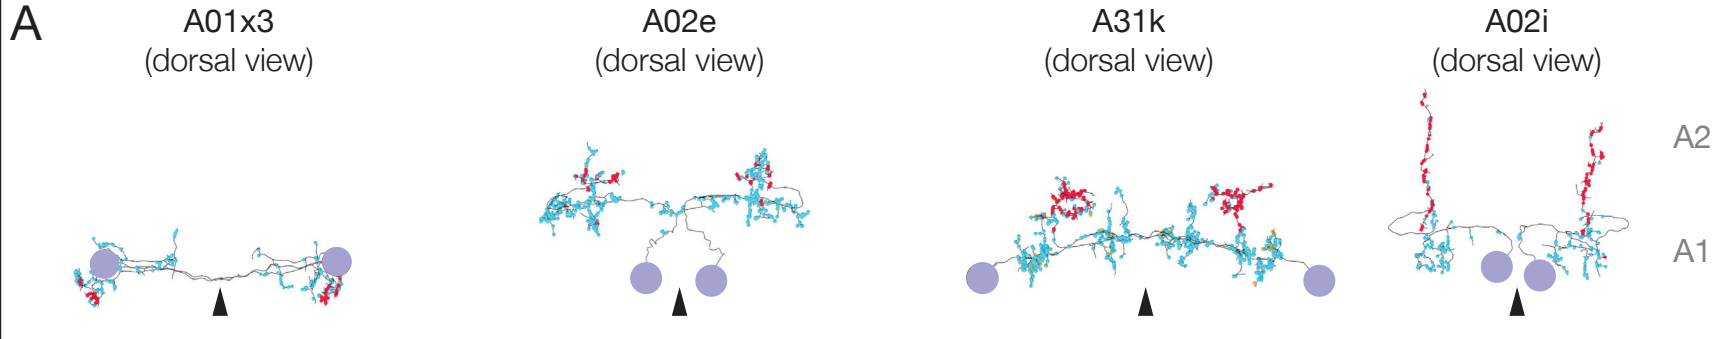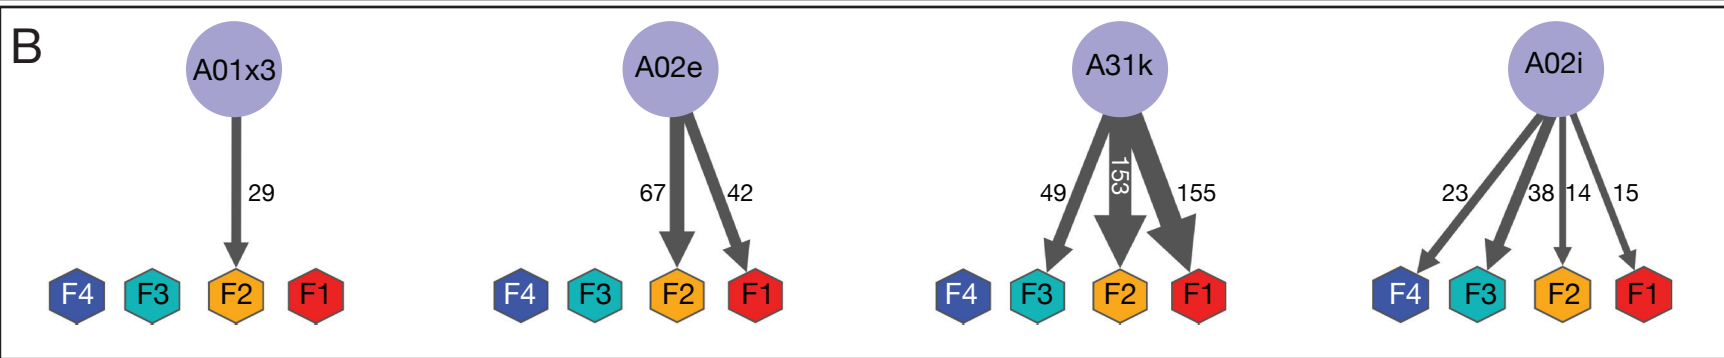

Figure 7 -- supplement 1

Supplement: supp [file elife-51781-supp-v1.zip]

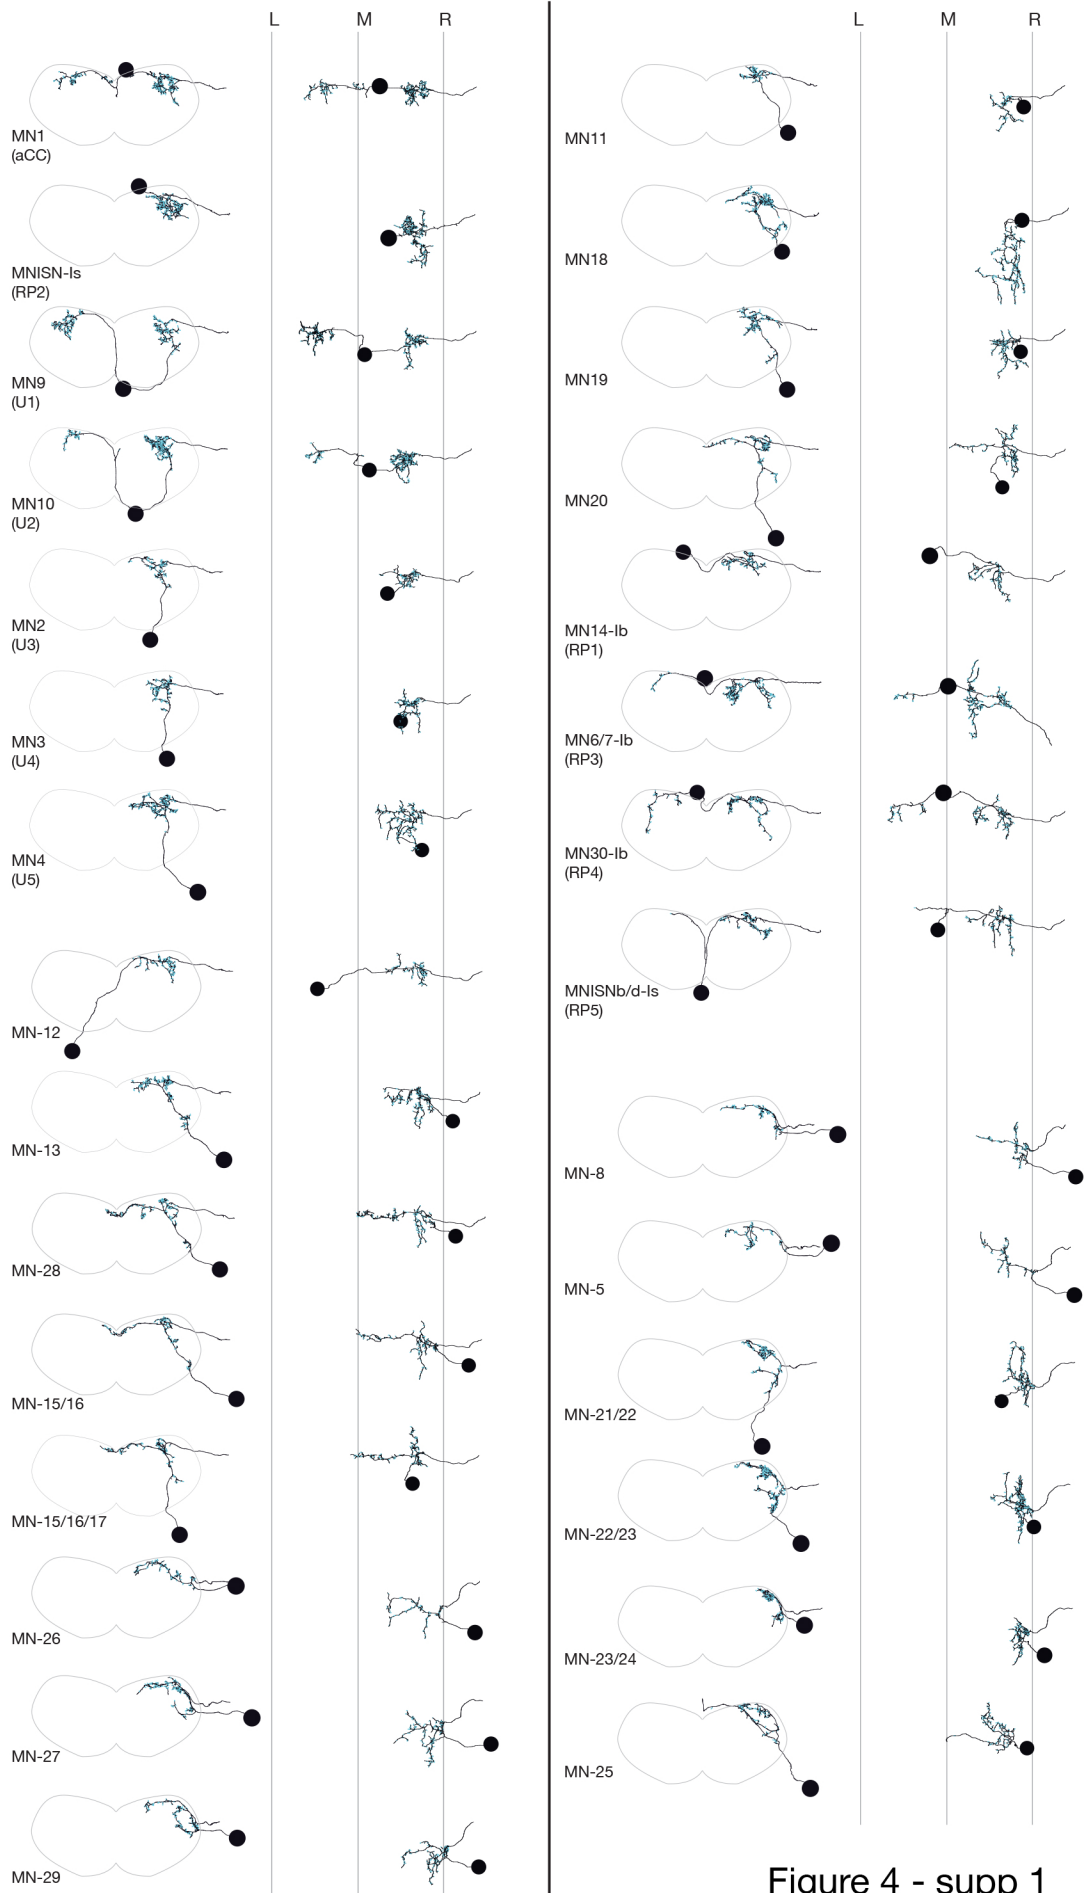

Figure 4 - supp 1

Supplement: supp [file elife-51781-supp-v1.zip]

Forward Crawls (unaligned)

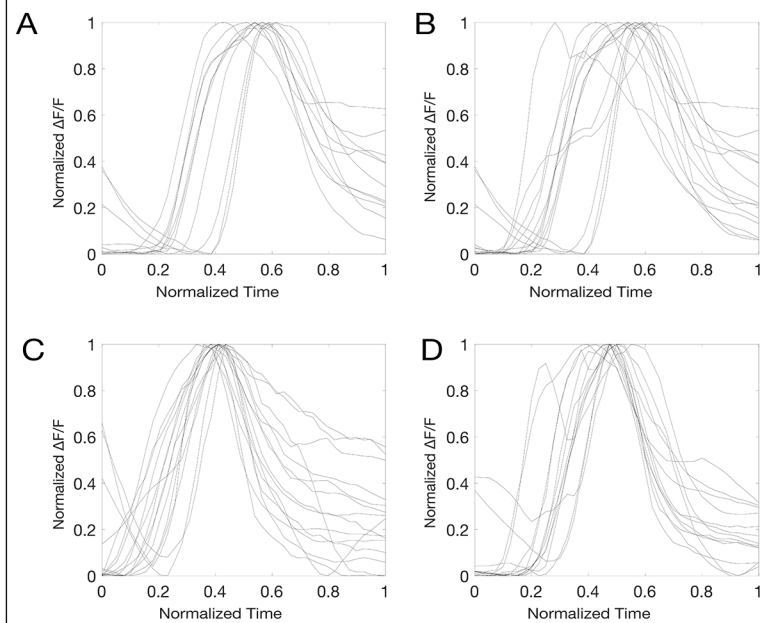

Forward Crawls (2D)

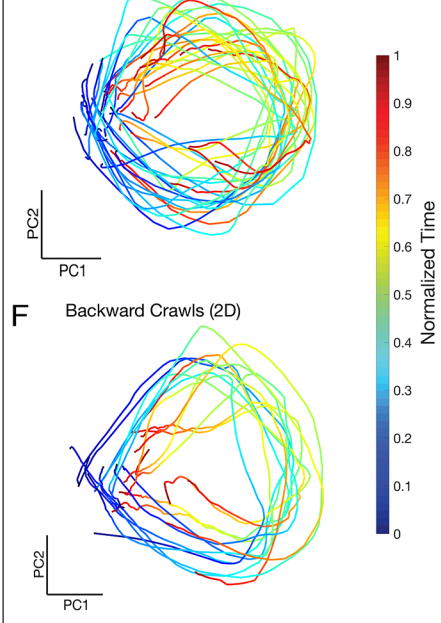

Backward Crawls (2D)

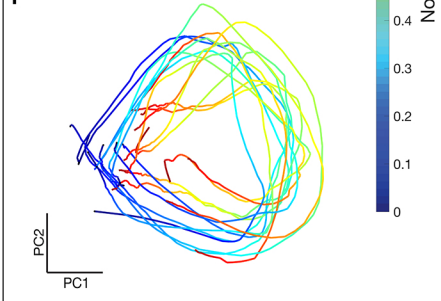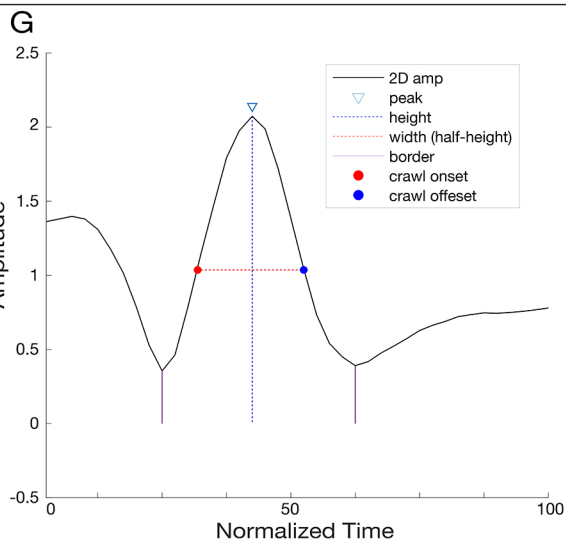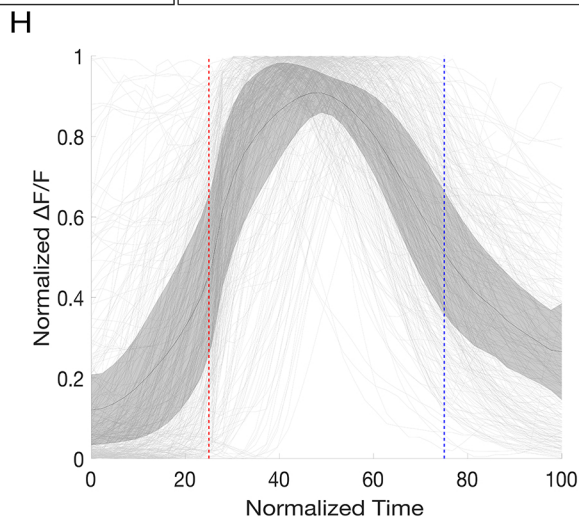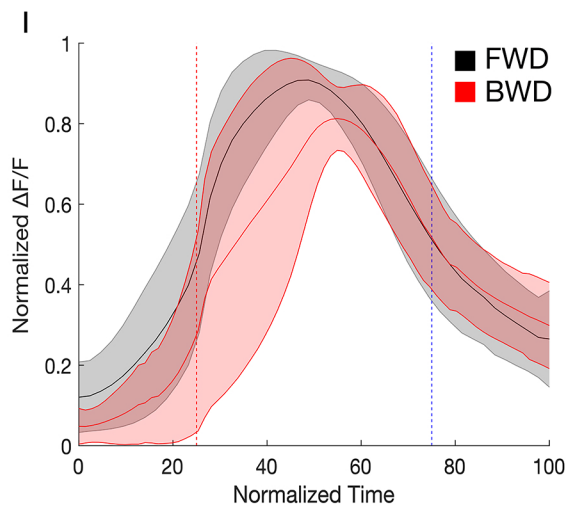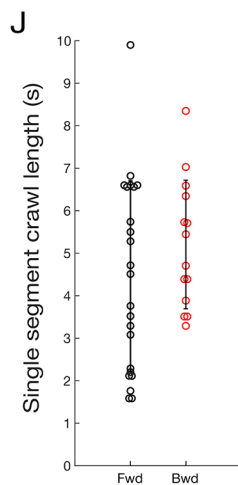

Figure 3 -- supp1

Supplement: supp [file elife-51781-supp-v1.zip › elife_poa_e51781_Figure_3_figure_supplement_1.pdf]
